# Supplementary material for: WHO and national lists of essential medicines in Mexico, Central and South America, and the Caribbean: are they adequate to promote paediatric endocrinology and diabetes care?
Source: PubMed Central journal article supplement — BMJ Glob Health. 2016 Oct 27;1(3):e000114. doi: 10.1136/bmjgh-2016-000114 (PMC5321367; doi:10.1136/bmjgh-2016-000114), 2016-10-27
Supplement: bmjgh-2016-000114supp_table.pdf [file bmjgh-2016-000114supp_table.pdf]

**Table S1: Supplementary files. Medicines that are included in the master list of medicines relevant to pediatric endocrinology and diabetes and that are mentioned in the national lists of essential medicines (EML) of each of the 25 countries for which information was available.**

**Adrenal Drugs**

|                                  | Injectable Hydrocortisone | Hydrocortisone | Prednisone | Prednisolone | Dexamethasone | Fludrocortisone |
|----------------------------------|---------------------------|----------------|------------|--------------|---------------|-----------------|
| Argentina                        | No                        | Yes            | Yes        | Yes          | Yes           | Yes             |
| Barbados                         | Yes                       | Yes            | No         | Yes          | Yes           | Yes             |
| Belize                           | Yes                       | No             | No         | Yes          | Yes           | No              |
| Bolivia                          | Yes                       | No             | Yes        | No           | Yes           | No              |
| Brazil                           | Yes                       | No             | Yes        | No           | Yes           | No              |
| Chile                            | Yes                       | Yes            | Yes        | No           | Yes           | Yes             |
| Colombia                         | Yes                       | No             | Yes        | Yes          | Yes           | Yes             |
| Costa Rica                       | Yes                       | Yes            | No         | Yes          | Yes           | Yes             |
| Cuba                             | Yes                       | Yes            | Yes        | Yes          | Yes           | No              |
| Dominican Republic               | Yes                       | No             | Yes        | Yes          | Yes           | Yes             |
| Ecuador                          | Yes                       | Yes            | Yes        | Yes          | Yes           | Yes             |
| El Salvador                      | Yes                       | No             | Yes        | Yes          | No            | Yes             |
| Guyana                           | Yes                       | No             | No         | Yes          | No            | No              |
| Haiti                            | Yes                       | No             | No         | Yes          | No            | No              |
| Honduras                         | Yes                       | No             | Yes        | Yes          | No            | No              |
| Jamaica                          | Yes                       | No             | Yes        | Yes          | Yes           | No              |
| Mexico                           | Yes                       | No             | Yes        | Yes          | Yes           | Yes             |
| Nicaragua                        | Yes                       | Yes            | Yes        | Yes          | Yes           | No              |
| Paraguay                         | Yes                       | No             | Yes        | No           | No            | No              |
| Peru                             | Yes                       | No             | Yes        | No           | Yes           | No              |
| Saint Vincent and the Grenadines | Yes                       | No             | No         | Yes          | No            | No              |
| Suriname                         | Yes                       | Yes            | No         | Yes          | Yes           | Yes             |
| Trinidad and Tobago              | Yes                       | No             | No         | Yes          | Yes           | Yes             |
| Uruguay                          | Yes                       | Yes            | Yes        | Yes          | Yes           | Yes             |
| Venezuela                        | Yes                       | No             | Yes        | Yes          | Yes           | No              |

## Thyroid

|                                  | L-Thyroxine | Propylthiouracil (PTU) | Methimazole | Carbimazole | Beta Blocker (Propranolol) |
|----------------------------------|-------------|------------------------|-------------|-------------|----------------------------|
| Argentina                        | Yes         | Yes                    | Yes         | No          | Yes                        |
| Barbados                         | Yes         | Yes                    | No          | Yes         | Yes                        |
| Belize                           | Yes         | Yes                    | No          | Yes         | Yes                        |
| Bolivia                          | Yes         | Yes                    | No          | No          | Yes                        |
| Brazil                           | Yes         | Yes                    | No          | No          | Yes                        |
| Chile                            | Yes         | Yes                    | No          | No          | Yes                        |
| Colombia                         | Yes         | Yes                    | Yes         | No          | Yes                        |
| Costa Rica                       | Yes         | Yes                    | No          | No          | Yes                        |
| Cuba                             | Yes         | Yes                    | Yes         | No          | Yes                        |
| Dominican Republic               | Yes         | Yes                    | Yes         | No          | Yes                        |
| Ecuador                          | Yes         | No                     | Yes         | No          | Yes                        |
| El Salvador                      | Yes         | Yes                    | No          | No          | Yes                        |
| Guyana                           | Yes         | Yes                    | No          | Yes         | Yes                        |
| Haiti                            | Yes         | Yes                    | No          | No          | Yes                        |
| Honduras                         | Yes         | Yes                    | Yes         | No          | Yes                        |
| Jamaica                          | Yes         | Yes                    | No          | Yes         | Yes                        |
| Mexico                           | Yes         | No                     | Yes         | No          | Yes                        |
| Nicaragua                        | Yes         | No                     | Yes         | No          | Yes                        |
| Paraguay                         | Yes         | Yes                    | No          | No          | Yes                        |
| Peru                             | Yes         | No                     | Yes         | No          | Yes                        |
| Saint Vincent and the Grenadines | Yes         | Yes                    | No          | Yes         | Yes                        |
| Suriname                         | Yes         | No                     | No          | Yes         | Yes                        |
| Trinidad and Tobago              | Yes         | Yes                    | No          | Yes         | Yes                        |
| Uruguay                          | Yes         | Yes                    | Yes         | No          | Yes                        |
| Venezuela                        | Yes         | Yes                    | Yes         | No          | Yes                        |

## Diabetes

|                                  | Insulin Short Acting | Insulin Short Acting Analogue | Insulin Long Acting | Insulin Long Acting Analogue | Insulin Pre-mix | Glucagon | Metformin | Sulfonylurea: Gliclazide | Sulfonylurea: Glimepride |
|----------------------------------|----------------------|-------------------------------|---------------------|------------------------------|-----------------|----------|-----------|--------------------------|--------------------------|
| Argentina                        | Yes                  | Yes                           | Yes                 | No                           | No              | Yes      | Yes       | No                       | No                       |
| Barbados                         | No                   | Yes                           | Yes                 | Yes                          | Yes             | Yes      | Yes       | Yes                      | Yes                      |
| Belize                           | Yes                  | No                            | Yes                 | No                           | Yes             | No       | Yes       | No                       | No                       |
| Bolivia                          | Yes                  | No                            | Yes                 | No                           | No              | No       | Yes       | No                       | No                       |
| Brazil                           | Yes                  | No                            | Yes                 | No                           | No              | No       | Yes       | Yes                      | No                       |
| Chile                            | Yes                  | Yes                           | Yes                 | No                           | No              | Yes      | Yes       | No                       | No                       |
| Colombia                         | Yes                  | Yes                           | Yes                 | Yes                          | Yes             | Yes      | Yes       | Yes                      | Yes                      |
| Costa Rica                       | Yes                  | No                            | No                  | No                           | No              | No       | Yes       | No                       | No                       |
| Cuba                             | Yes                  | Yes                           | Yes                 | No                           | No              | Yes      | Yes       | No                       | Yes                      |
| Dominican Republic               | Yes                  | No                            | Yes                 | No                           | No              | Yes      | Yes       | No                       | No                       |
| Ecuador                          | No                   | Yes                           | Yes                 | No                           | No              | Yes      | Yes       | No                       | No                       |
| El Salvador                      | Yes                  | No                            | Yes                 | No                           | No              | No       | Yes       | No                       | No                       |
| Guyana                           | Yes                  | No                            | Yes                 | No                           | Yes             | Yes      | Yes       | Yes                      | No                       |
| Haiti                            | Yes                  | No                            | Yes                 | No                           | No              | No       | Yes       | No                       | No                       |
| Honduras                         | Yes                  | Yes                           | Yes                 | No                           | No              | Yes      | Yes       | No                       | No                       |
| Jamaica                          | Yes                  | Yes                           | Yes                 | Yes                          | Yes             | Yes      | Yes       | Yes                      | Yes                      |
| Mexico                           | Yes                  | Yes                           | Yes                 | Yes                          | No              | Yes      | Yes       | No                       | No                       |
| Nicaragua                        | Yes                  | No                            | Yes                 | No                           | No              | No       | Yes       | No                       | No                       |
| Paraguay                         | Yes                  | Yes                           | No                  | Yes                          | Yes             | No       | Yes       | No                       | Yes                      |
| Peru                             | Yes                  | No                            | Yes                 | No                           | No              | No       | Yes       | No                       | No                       |
| Saint Vincent and the Grenadines | Yes                  | No                            | Yes                 | No                           | Yes             | No       | Yes       | Yes                      | No                       |
| Suriname                         | Yes                  | No                            | Yes                 | No                           | No              | No       | Yes       | No                       | No                       |
| Trinidad and Tobago              | Yes                  | No                            | Yes                 | Yes                          | Yes             | No       | Yes       | Yes                      | Yes                      |
| Uruguay                          | Yes                  | Yes                           | Yes                 | Yes                          | No              | Yes      | Yes       | Yes                      | Yes                      |
| Venezuela                        | Yes                  | No                            | Yes                 | No                           | Yes             | No       | Yes       | No                       | No                       |

## Water Metabolism

|                                  | Vasopressin analogs | Desmopressin (DDAVP) |
|----------------------------------|---------------------|----------------------|
| Argentina                        | Yes                 | Yes                  |
| Barbados                         | Yes                 | Yes                  |
| Belize                           | No                  | Yes                  |
| Bolivia                          | No                  | Yes                  |
| Brazil                           | No                  | No                   |
| Chile                            | No                  | Yes                  |
| Colombia                         | Yes                 | Yes                  |
| Costa Rica                       | No                  | Yes                  |
| Cuba                             | No                  | Yes                  |
| Dominican Republic               | Yes                 | No                   |
| Ecuador                          | No                  | Yes                  |
| El Salvador                      | No                  | Yes                  |
| Guyana                           | No                  | Yes                  |
| Haiti                            | No                  | No                   |
| Honduras                         | No                  | Yes                  |
| Jamaica                          | Yes                 | No                   |
| Mexico                           | Yes                 | Yes                  |
| Nicaragua                        | Yes                 | Yes                  |
| Paraguay                         | No                  | Yes                  |
| Peru                             | No                  | No                   |
| Saint Vincent and the Grenadines | No                  | No                   |
| Suriname                         | No                  | Yes                  |
| Trinidad and Tobago              | No                  | No                   |
| Uruguay                          | No                  | Yes                  |
| Venezuela                        | No                  | Yes                  |

## Gonads

|                                     | Testosterone | Medroxyprogesterone | 17b Estradiol/Ethinylestradiol/<br>Conjugated Estrogens | GnRH analogues | Oral Contraceptives<br>(Estroprogesterones) | Depot Progestin:<br>Medroxyprogesterone | Depot Progestin:<br>Other |
|-------------------------------------|--------------|---------------------|---------------------------------------------------------|----------------|---------------------------------------------|-----------------------------------------|---------------------------|
| Argentina                           | Yes          | Yes                 | Yes                                                     | Yes            | Yes                                         | Yes                                     | No                        |
| Barbados                            | Yes          | Yes                 | Yes                                                     | Yes            | No                                          | Yes                                     | No                        |
| Belize                              | No           | Yes                 | Yes                                                     | No             | Yes                                         | Yes                                     | No                        |
| Bolivia                             | Yes          | Yes                 | Yes                                                     | No             | Yes                                         | Yes                                     | No                        |
| Brazil                              | Yes          | Yes                 | Yes                                                     | No             | Yes                                         | Yes                                     | No                        |
| Chile                               | Yes          | Yes                 | Yes                                                     | No             | Yes                                         | Yes                                     | No                        |
| Colombia                            | Yes          | Yes                 | Yes                                                     | Yes            | Yes                                         | Yes                                     | No                        |
| Costa Rica                          | Yes          | Yes                 | Yes                                                     | Yes            | Yes                                         | Yes                                     | No                        |
| Cuba                                | Yes          | Yes                 | Yes                                                     | No             | Yes                                         | Yes                                     | No                        |
| Dominican Republic                  | Yes          | Yes                 | Yes                                                     | Yes            | Yes                                         | Yes                                     | No                        |
| Ecuador                             | Yes          | No                  | Yes                                                     | Yes            | Yes                                         | No                                      | No                        |
| El Salvador                         | No           | No                  | Yes                                                     | Yes            | Yes                                         | Yes                                     | No                        |
| Guyana                              | No           | No                  | Yes                                                     | No             | Yes                                         | No                                      | No                        |
| Haiti                               | No           | No                  | No                                                      | No             | Yes                                         | Yes                                     | Yes                       |
| Honduras                            | No           | Yes                 | Yes                                                     | Yes            | Yes                                         | Yes                                     | No                        |
| Jamaica                             | Yes          | No                  | Yes                                                     | Yes            | Yes                                         | Yes                                     | Yes                       |
| Mexico                              | Yes          | Yes                 | Yes                                                     | Yes            | Yes                                         | Yes                                     | No                        |
| Nicaragua                           | No           | No                  | No                                                      | No             | Yes                                         | Yes                                     | No                        |
| Paraguay                            | No           | No                  | No                                                      | No             | Yes                                         | Yes                                     | No                        |
| Peru                                | Yes          | Yes                 | Yes                                                     | Yes            | Yes                                         | Yes                                     | No                        |
| Saint Vincent and the<br>Grenadines | Yes          | No                  | Yes                                                     | No             | Yes                                         | Yes                                     | No                        |
| Suriname                            | Yes          | No                  | Yes                                                     | No             | Yes                                         | Yes                                     | Yes                       |
| Trinidad and Tobago                 | No           | Yes                 | Yes                                                     | Yes            | Yes                                         | Yes                                     | No                        |
| Uruguay                             | Yes          | Yes                 | Yes                                                     | Yes            | Yes                                         | No                                      | No                        |
| Venezuela                           | No           | Yes                 | Yes                                                     | No             | Yes                                         | Yes                                     | No                        |

**Bones/Calcium**

|                                  | Calcitriol/1 $\alpha$ vitamin D | Vitamin D2/D3 | Ibandronate | Pamidronate | Zoledronate | Alendronate | Risedronate |
|----------------------------------|---------------------------------|---------------|-------------|-------------|-------------|-------------|-------------|
| Argentina                        | Yes                             | Yes           | No          | No          | No          | Yes         | No          |
| Barbados                         | Yes                             | No            | Yes         | No          | Yes         | Yes         | Yes         |
| Belize                           | No                              | Yes           | No          | No          | No          | No          | No          |
| Bolivia                          | No                              | Yes           | No          | No          | No          | Yes         | No          |
| Brazil                           | Yes                             | Yes           | No          | Yes         | No          | Yes         | No          |
| Chile                            | No                              | Yes           | No          | Yes         | Yes         | No          | No          |
| Colombia                         | Yes                             | Yes           | Yes         | Yes         | Yes         | Yes         | Yes         |
| Costa Rica                       | Yes                             | Yes           | No          | No          | Yes         | Yes         | No          |
| Cuba                             | Yes                             | Yes           | No          | Yes         | Yes         | No          | No          |
| Dominican Republic               | No                              | Yes           | No          | No          | No          | No          | No          |
| Ecuador                          | Yes                             | No            | No          | No          | Yes         | Yes         | No          |
| El Salvador                      | No                              | Yes           | No          | No          | No          | Yes         | No          |
| Guyana                           | No                              | No            | No          | No          | No          | No          | No          |
| Haiti                            | No                              | No            | No          | No          | No          | No          | No          |
| Honduras                         | No                              | Yes           | No          | No          | Yes         | Yes         | No          |
| Jamaica                          | Yes                             | No            | No          | No          | No          | No          | No          |
| Mexico                           | Yes                             | Yes           | No          | No          | Yes         | Yes         | Yes         |
| Nicaragua                        | Yes                             | No            | No          | No          | No          | No          | No          |
| Paraguay                         | No                              | No            | No          | No          | No          | Yes         | No          |
| Peru                             | Yes                             | Yes           | No          | Yes         | No          | Yes         | No          |
| Saint Vincent and the Grenadines | No                              | No            | No          | No          | No          | No          | No          |
| Suriname                         | No                              | Yes           | No          | No          | No          | No          | No          |
| Trinidad and Tobago              | Yes                             | No            | Yes         | No          | Yes         | Yes         | Yes         |
| Uruguay                          | Yes                             | Yes           | No          | Yes         | No          | Yes         | Yes         |
| Venezuela                        | No                              | No            | No          | No          | No          | Yes         | No          |

## Hypoglycemia

|                                  | Diazoxide | Somatostatin |
|----------------------------------|-----------|--------------|
| Argentina                        | Yes       | Yes          |
| Barbados                         | No        | Yes          |
| Belize                           | No        | No           |
| Bolivia                          | No        | No           |
| Brazil                           | No        | No           |
| Chile                            | No        | No           |
| Colombia                         | Yes       | Yes          |
| Costa Rica                       | Yes       | Yes          |
| Cuba                             | Yes       | Yes          |
| Dominican Republic               | No        | Yes          |
| Ecuador                          | No        | Yes          |
| El Salvador                      | No        | Yes          |
| Guyana                           | No        | No           |
| Haiti                            | No        | No           |
| Honduras                         | No        | Yes          |
| Jamaica                          | No        | No           |
| Mexico                           | No        | Yes          |
| Nicaragua                        | No        | No           |
| Paraguay                         | No        | No           |
| Peru                             | No        | No           |
| Saint Vincent and the Grenadines | No        | No           |
| Suriname                         | No        | Yes          |
| Trinidad and Tobago              | No        | Yes          |
| Uruguay                          | No        | Yes          |
| Venezuela                        | No        | No           |

## Growth Hormone

|                                  | Growth Hormone |
|----------------------------------|----------------|
| Argentina                        | No             |
| Barbados                         | No             |
| Belize                           | No             |
| Bolivia                          | No             |
| Brazil                           | No             |
| Chile                            | No             |
| Colombia                         | Yes            |
| Costa Rica                       | Yes            |
| Cuba                             | Yes            |
| Dominican Republic               | No             |
| Ecuador                          | No             |
| El Salvador                      | No             |
| Guyana                           | No             |
| Haiti                            | No             |
| Honduras                         | Yes            |
| Jamaica                          | No             |
| Mexico                           | Yes            |
| Nicaragua                        | No             |
| Paraguay                         | No             |
| Peru                             | No             |
| Saint Vincent and the Grenadines | No             |
| Suriname                         | No             |
| Trinidad and Tobago              | No             |
| Uruguay                          | No             |
| Venezuela                        | No             |
